# Supplementary material
Source: Springer Nature journal article supplement (https://www.springermedizin.de/resource/supplementary/12889_2010_2204_MOESM3_ESM.pdf/9484960)
Supplement: MOESM3 [file 9484960]

|                               | <b>Cognitive</b>                                                                                                                                                                                       | <b>Emotional</b>                                                                                                                                                                                                                                                  | <b>Physical</b>                                                                                                                                                                                                                                                           |
|-------------------------------|--------------------------------------------------------------------------------------------------------------------------------------------------------------------------------------------------------|-------------------------------------------------------------------------------------------------------------------------------------------------------------------------------------------------------------------------------------------------------------------|---------------------------------------------------------------------------------------------------------------------------------------------------------------------------------------------------------------------------------------------------------------------------|
| <b>Job resources</b>          | <ul style="list-style-type: none"> <li>• increasing job autonomy and feedback, e.g. by increasing room to (co)decide on relevant work issues</li> </ul>                                                | <ul style="list-style-type: none"> <li>• increasing emotional support from supervisor and colleagues, e.g. by increasing room for discussing emotional issues between employee and supervisor</li> <li>• management training (e.g. on giving feedback)</li> </ul> | <ul style="list-style-type: none"> <li>• purchasing more or better physical equipment</li> <li>• checking if physical equipment is used correctly</li> </ul>                                                                                                              |
| <b>Recovery at/after work</b> | <ul style="list-style-type: none"> <li>• workshop effective cognitive detachment during and after work</li> <li>• increasing room to take a break when working on cognitive strenuous tasks</li> </ul> | <ul style="list-style-type: none"> <li>• workshop effective emotional detachment during and after work</li> <li>• increasing organizing/deciding on 'time out' when something very emotional occurs</li> </ul>                                                    | <ul style="list-style-type: none"> <li>• workshop effective physical detachment during and after work</li> <li>• establishing fitness programmes or other sport and physical activities (e.g. during lunch or other breaks/lunch strolling) aiming at recovery</li> </ul> |
